# Supplementary material
Source: MDPI journal article supplement (https://www.mdpi.com/2072-4292/12/24/4124)
Supplement: s1 [file s1]

Supplementary Materials

Algorithms used for assignation of the Scott and Burgan model per species/land use types, according to Table 2: Fcc = Forest Canopy Cover; CCarb = Understory Shrub Cover; Yellow colour = model assigned if the pixel is located within the dry area; Blue colour = model assigned if the pixel is located within the humid area; Black colour = model assigned regardless of the area; n = representativeness of the model (% in the total area covered by species).

1. Wooded forest area

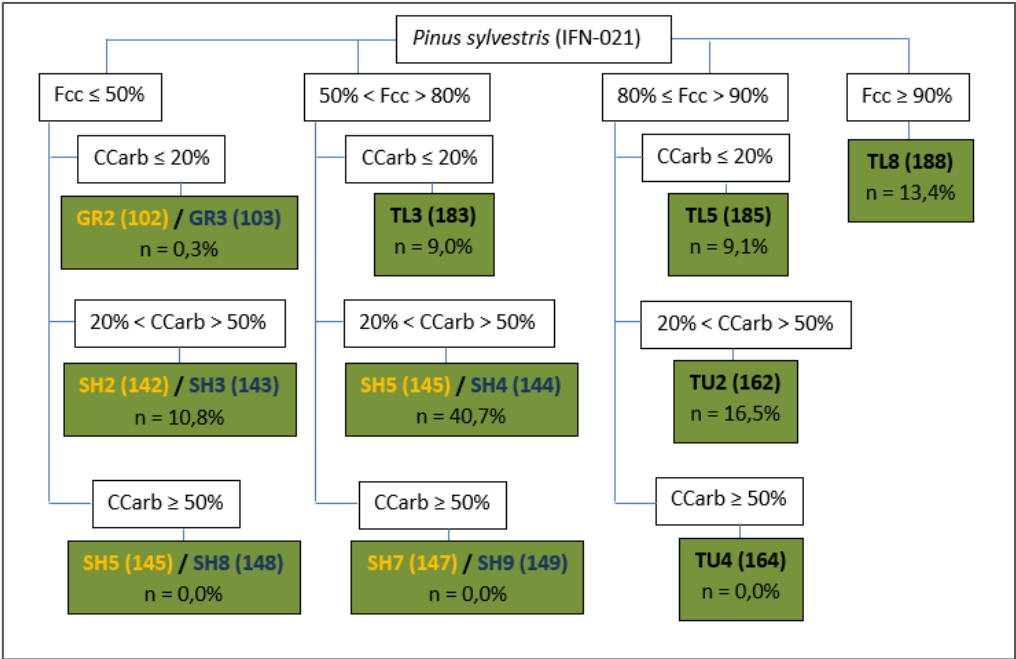

Algorithm used for assignation of the Scott and Burgan [62] model to stands populated by *Pinus sylvestris*

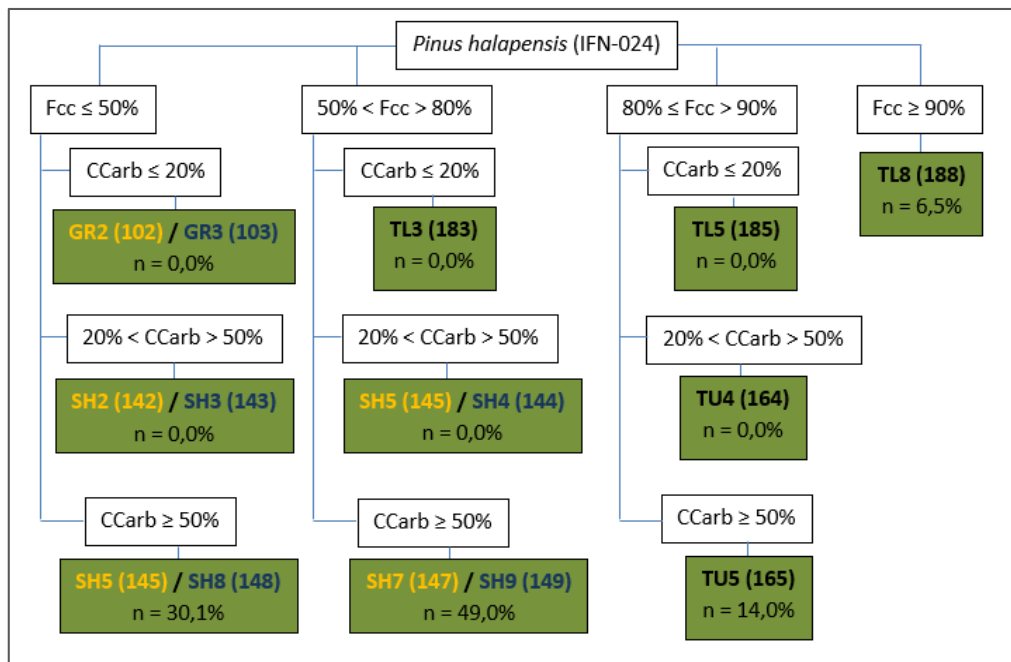

Algorithm used for assignation of the Scott and Burgan [62] model to stands populated by *Pinus halepensis*

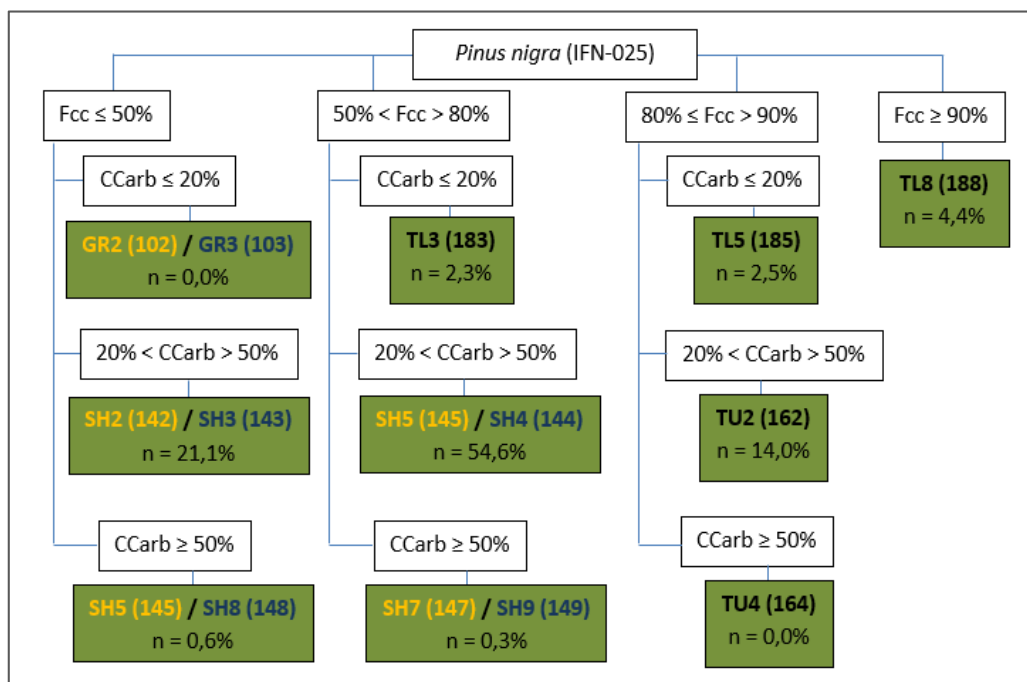

Algorithm used for assignation of the Scott and Burgan [62] model to stands populated by *Pinus nigra*

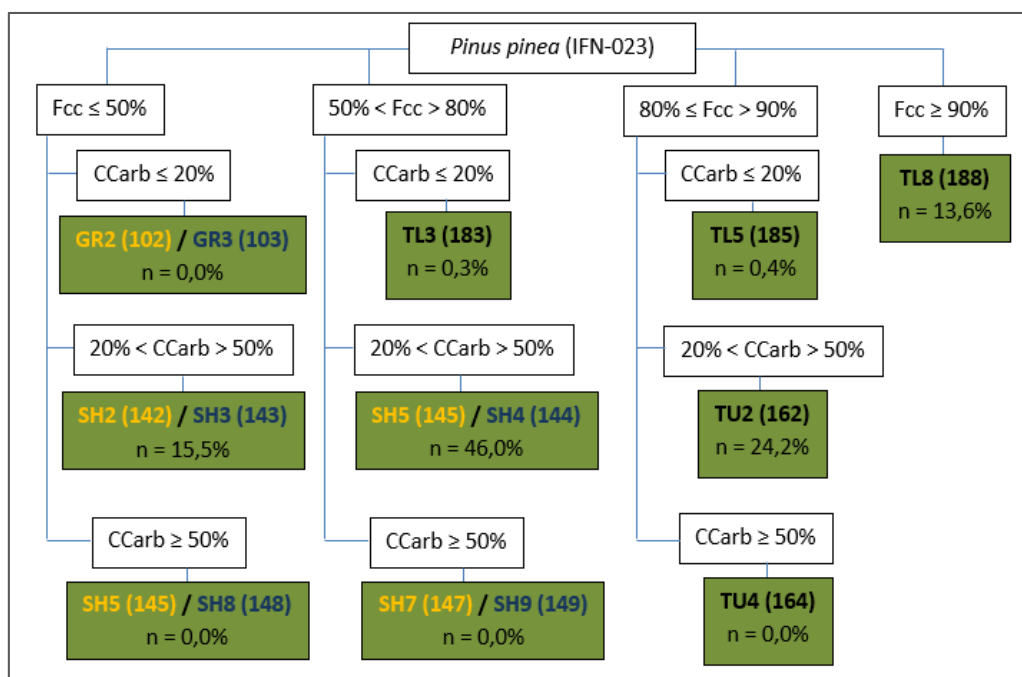

Algorithm used for assignation of the Scott and Burgan [62] model to stands populated by *Pinus pinea*

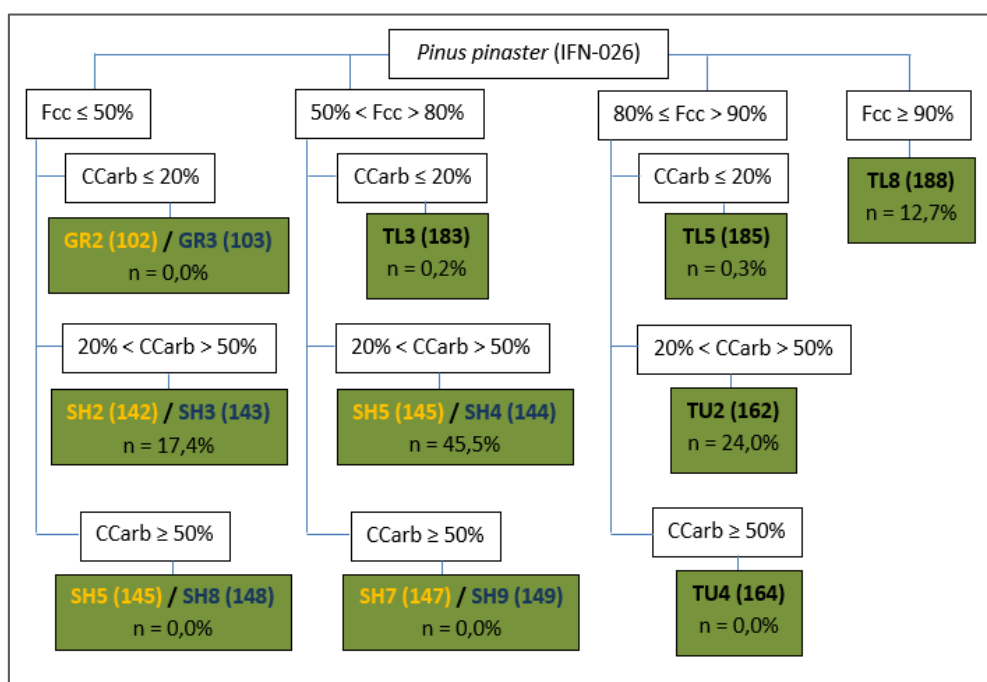

Algorithm used for assignation of the Scott and Burgan [62] model to stands populated by *Pinus pinaster*

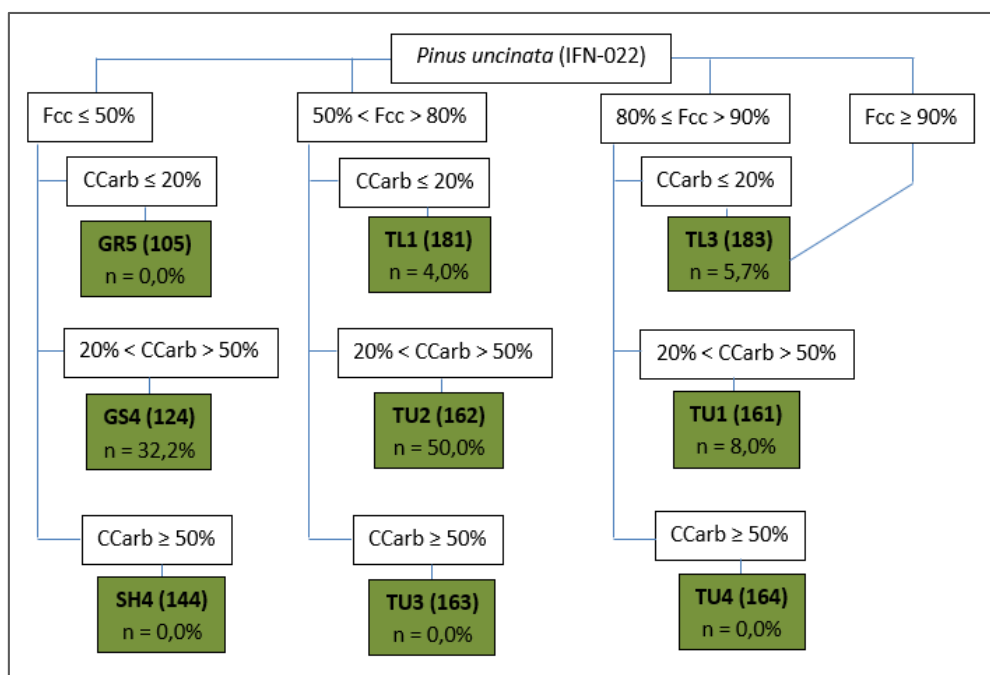

Algorithm used for assignation of the Scott and Burgan [62] model to stands populated by *Pinus uncinata*

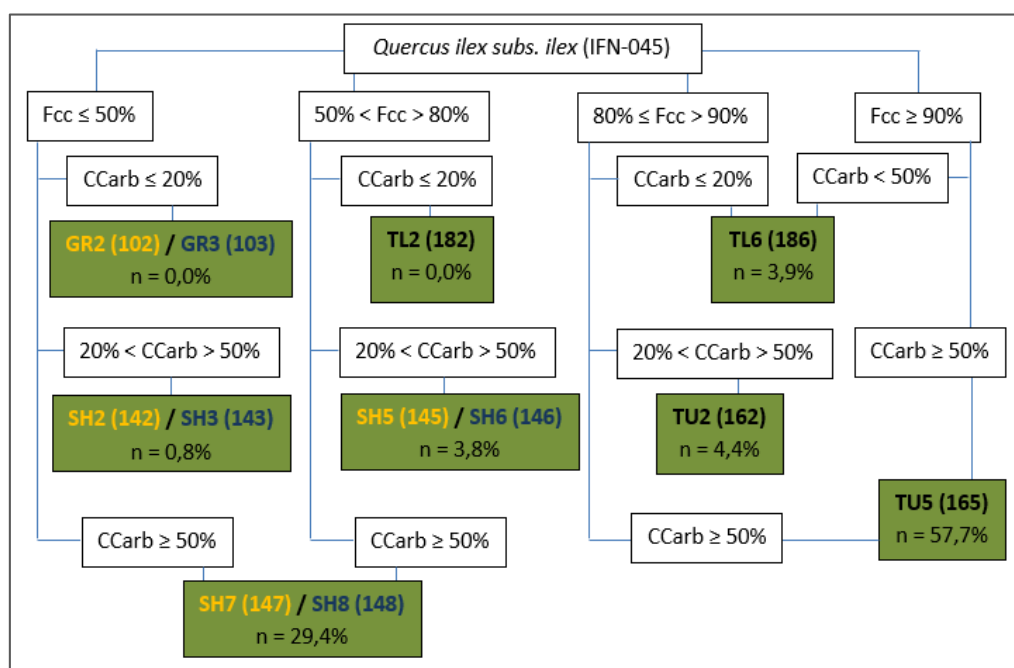

Algorithm used for assignation of the Scott and Burgan [62] model to stands populated by *Quercus ilex ilex*

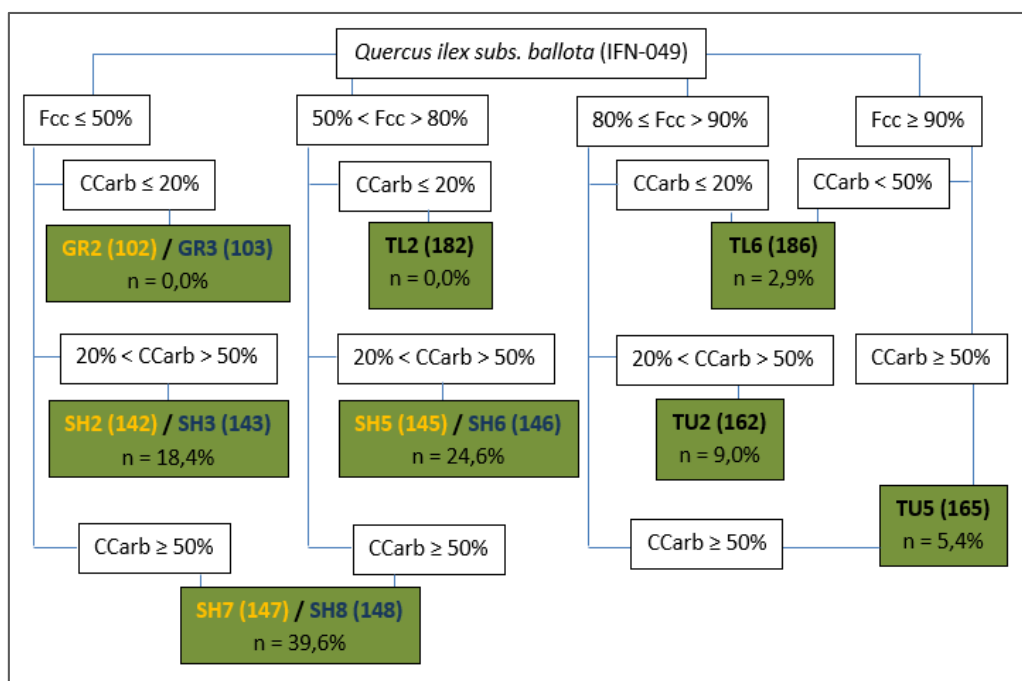

Algorithm used for assignation of the Scott and Burgan [62] model to stands populated by *Quercus ilex ballota*

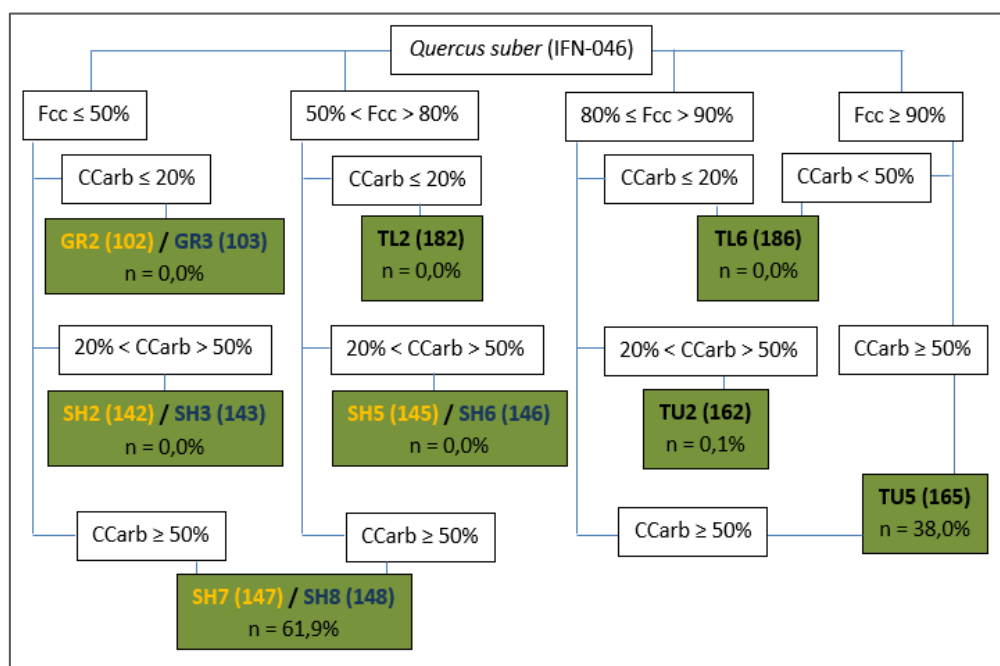

Algorithm used for assignation of the Scott and Burgan [62] model to stands populated by *Quercus suber*

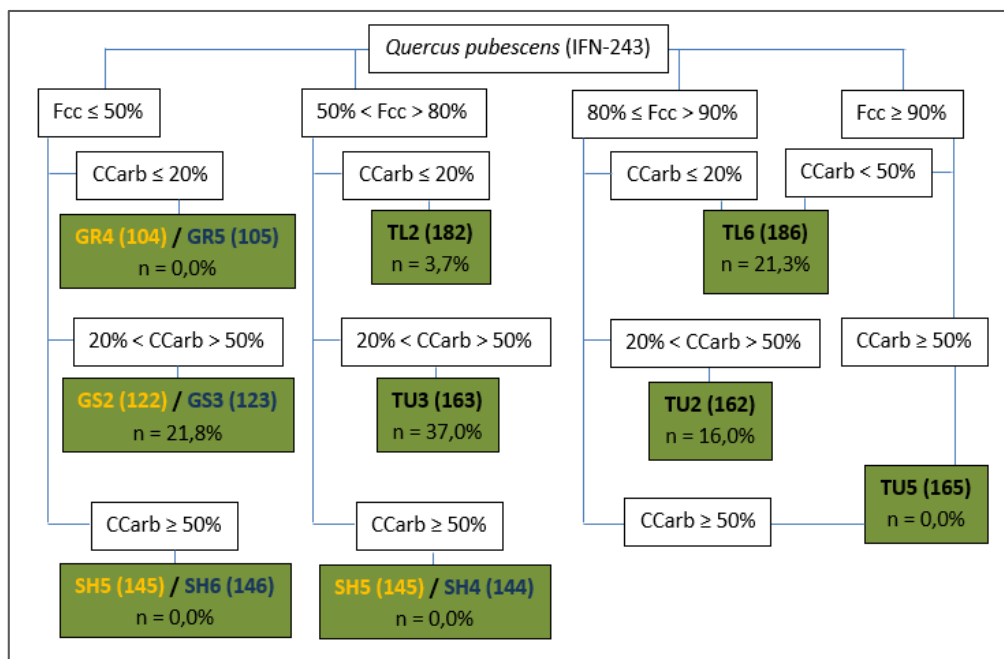

Algorithm used for assignation of the Scott and Burgan [62] model to stands populated by *Quercus pubescens*

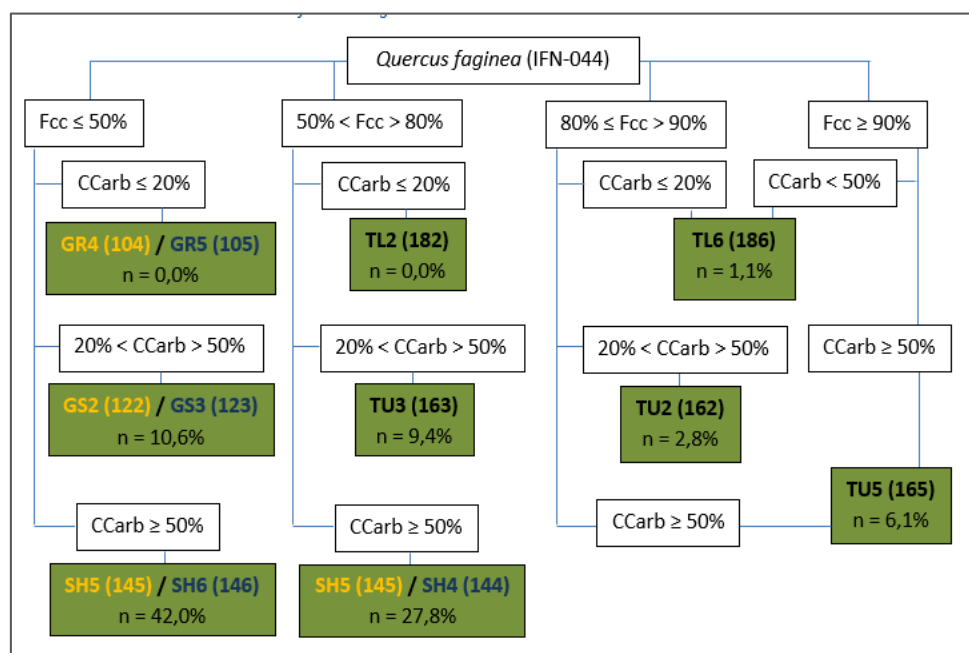

Algorithm used for assignation of the Scott and Burgan [62] model to stands populated by *Quercus faginea*

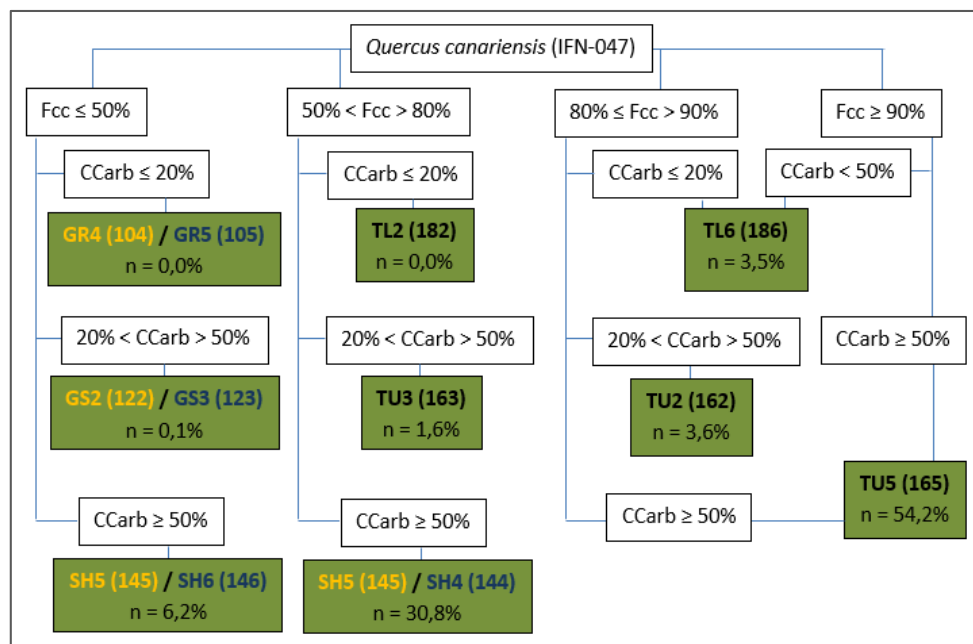

Algorithm used for assignation of the Scott and Burgan [62] model to stands populated by *Quercus canariensis*

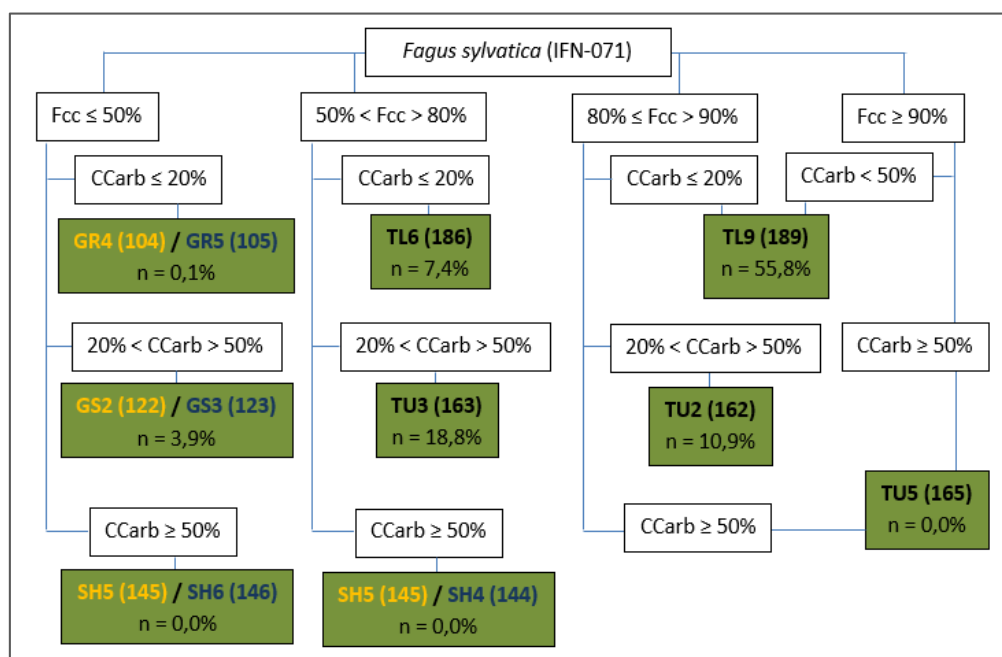

Algorithm used for assignation of the Scott and Burgan [62] model to stands populated by *Fagus sylvatica*

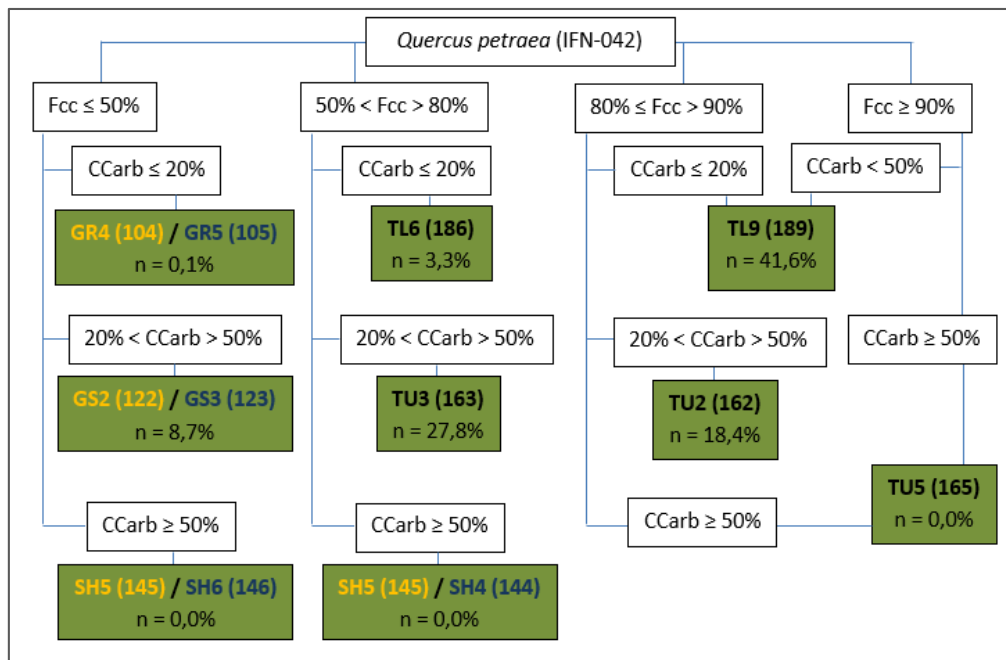

Algorithm used for assignation of the Scott and Burgan [62] model to stands populated by *Quercus petraea*

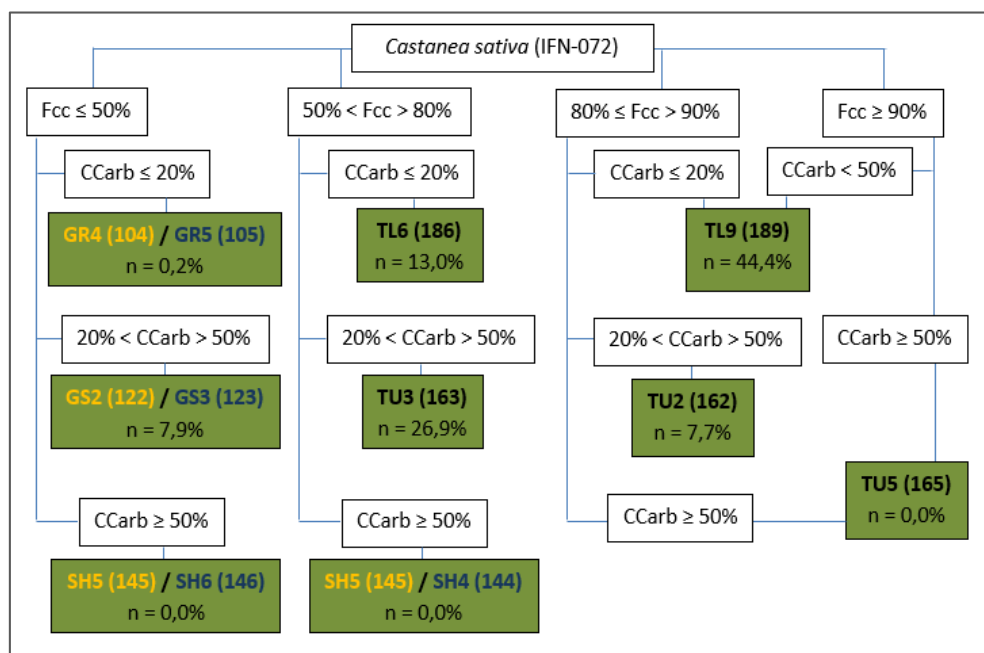

Algorithm used for assignation of the Scott and Burgan [62] model to stands populated by *Castanea sativa*



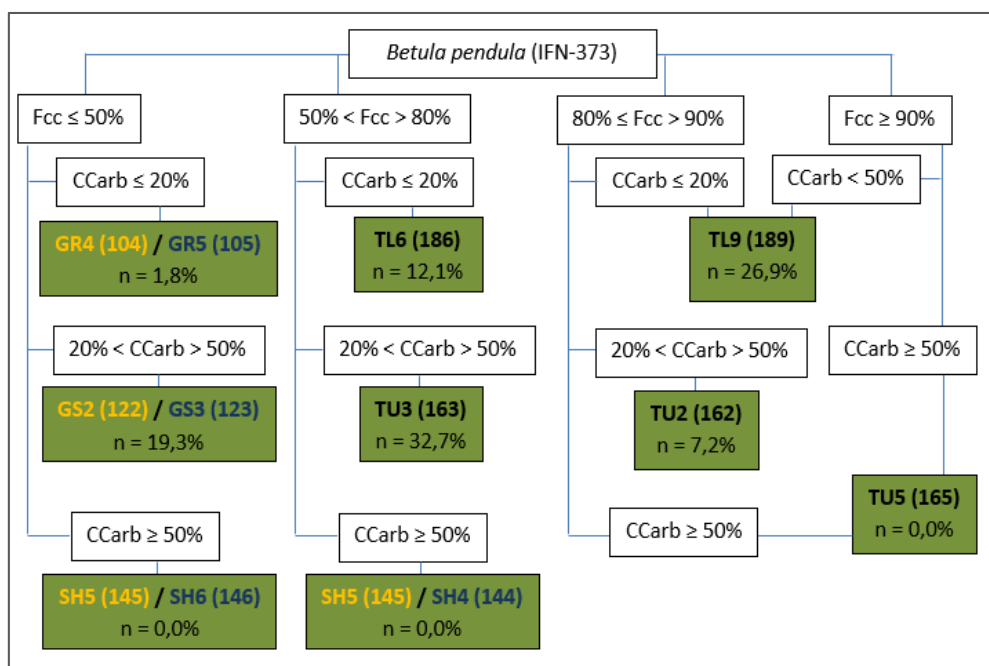

Algorithm used for assignation of the Scott and Burgan [62] model to stands populated by *Betula pendula*

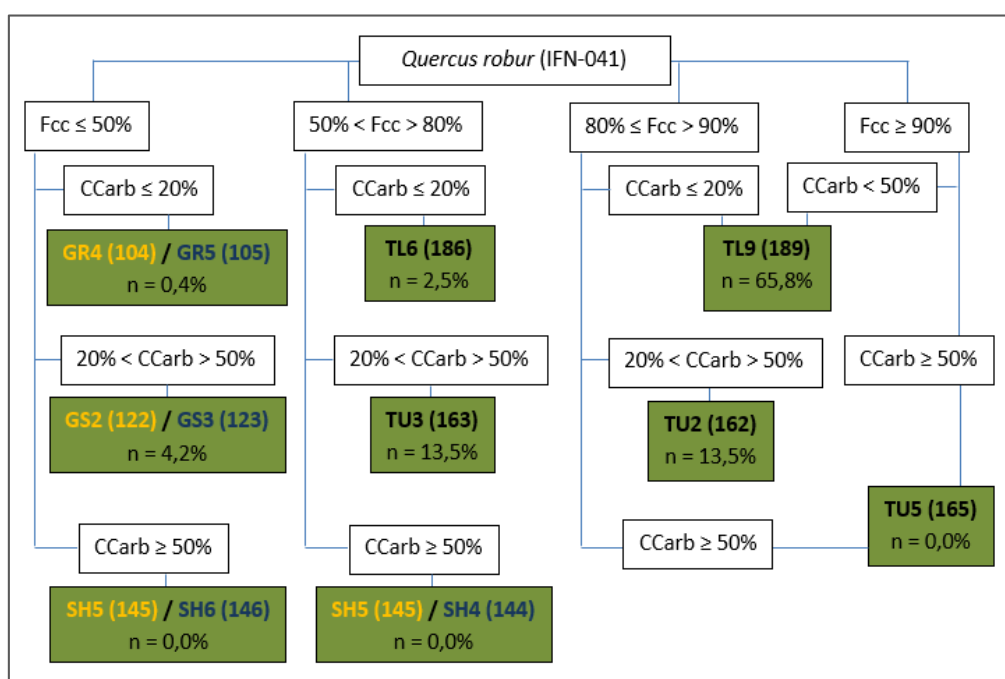

Algorithm used for assignation of the Scott and Burgan [62] model to stands populated by *Quercus robur*

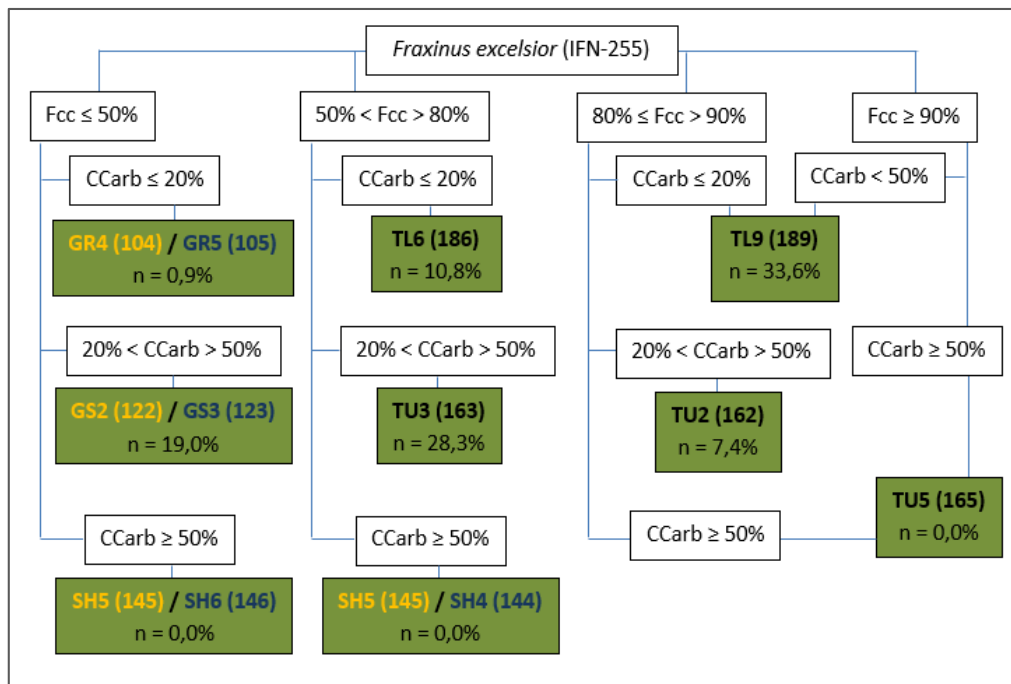

Algorithm used for assignation of the Scott and Burgan [62] model to stands populated by *Fraxinus excelsior*

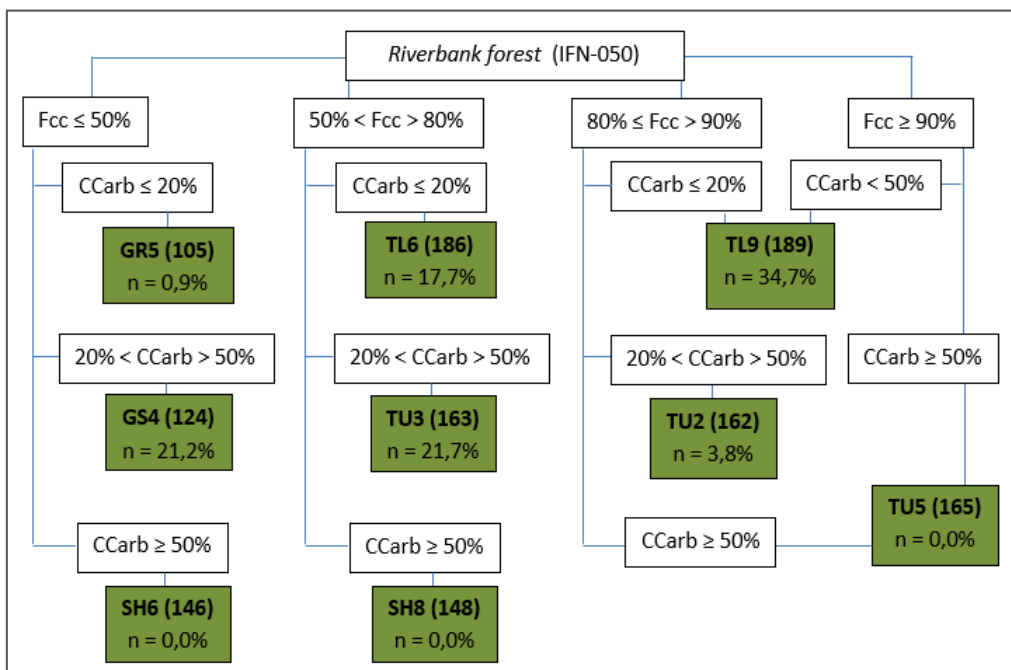

Algorithm used for assignation of the Scott and Burgan [62] model to stands populated by riverbank forest

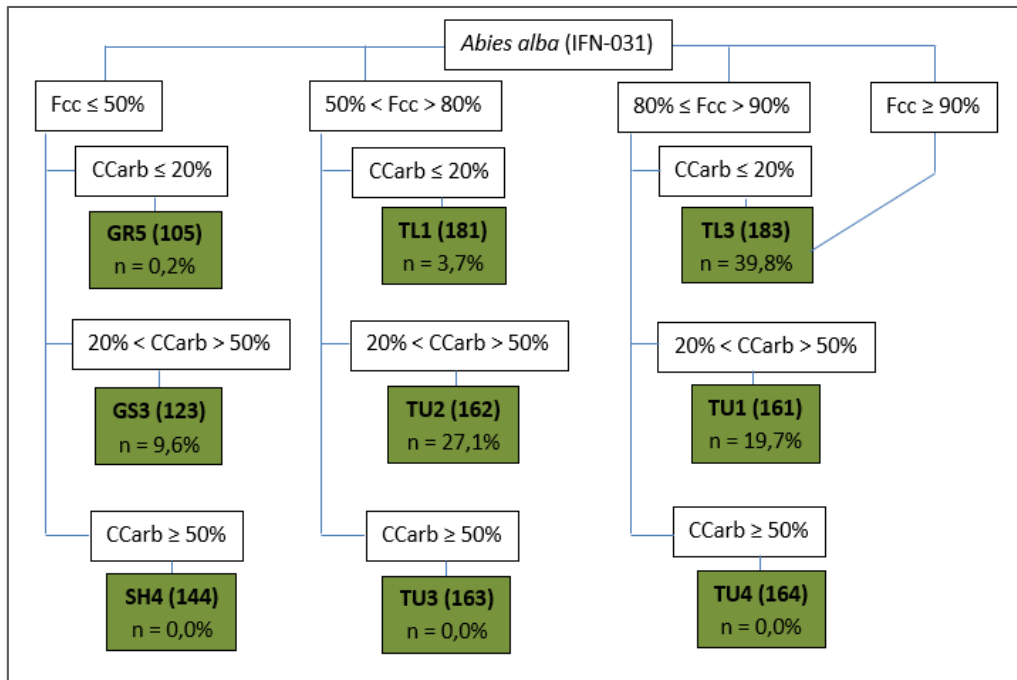

Algorithm used for assignation of the Scott and Burgan [62] model to stands populated by *Abies alba*

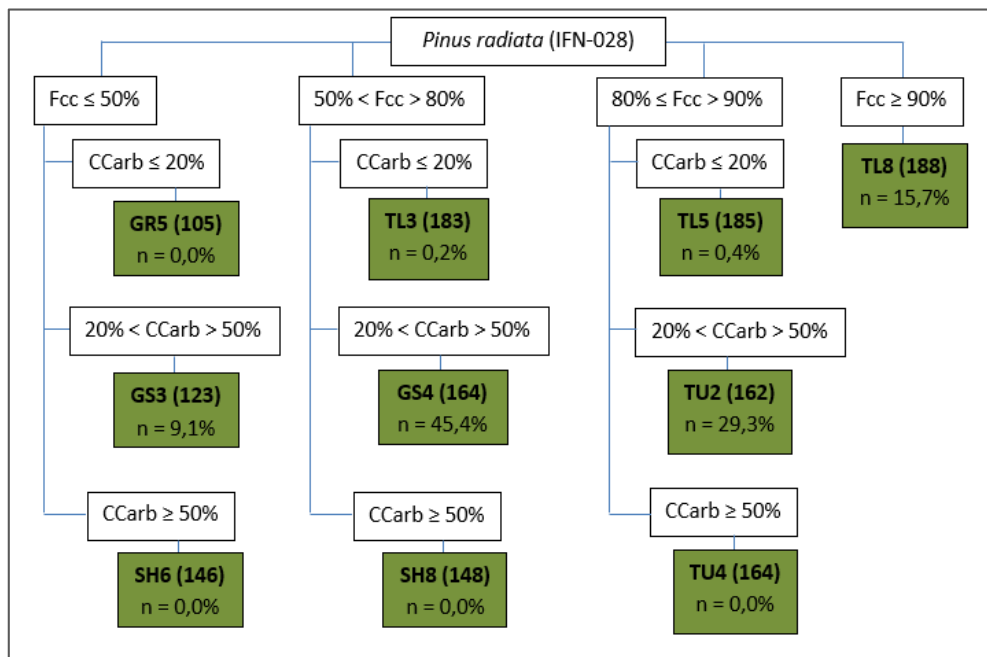

Algorithm used for assignation of the Scott and Burgan [62] model to stands populated by *Pinus radiata*

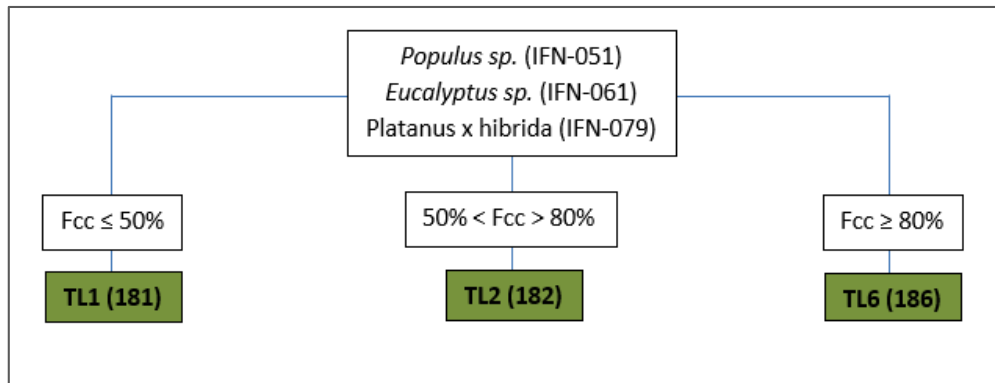

Algorithm used for assignment of the Scott and Burgan [62] model to stands populated by *Populus sp.*, *Eucalyptus sp.* or *Platanus x hybrida*

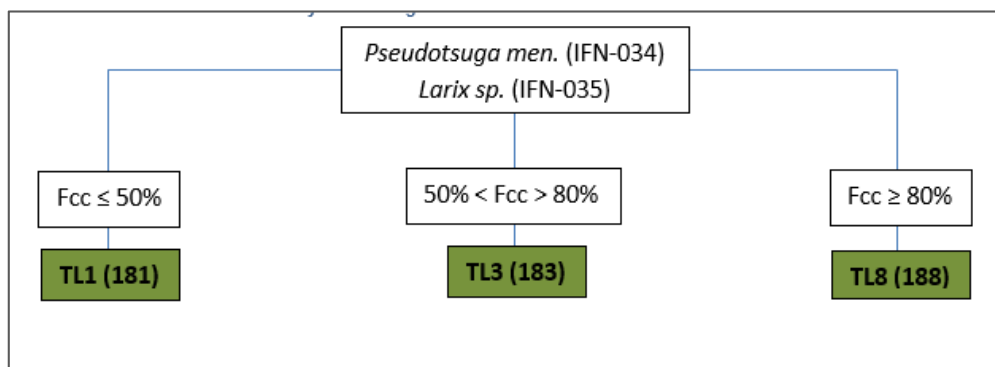

Algorithm used for assignment of the Scott and Burgan [62] model to stands populated by *Pseudotsuga men.* or *Larix sp.*

## 2. Regenerated forest

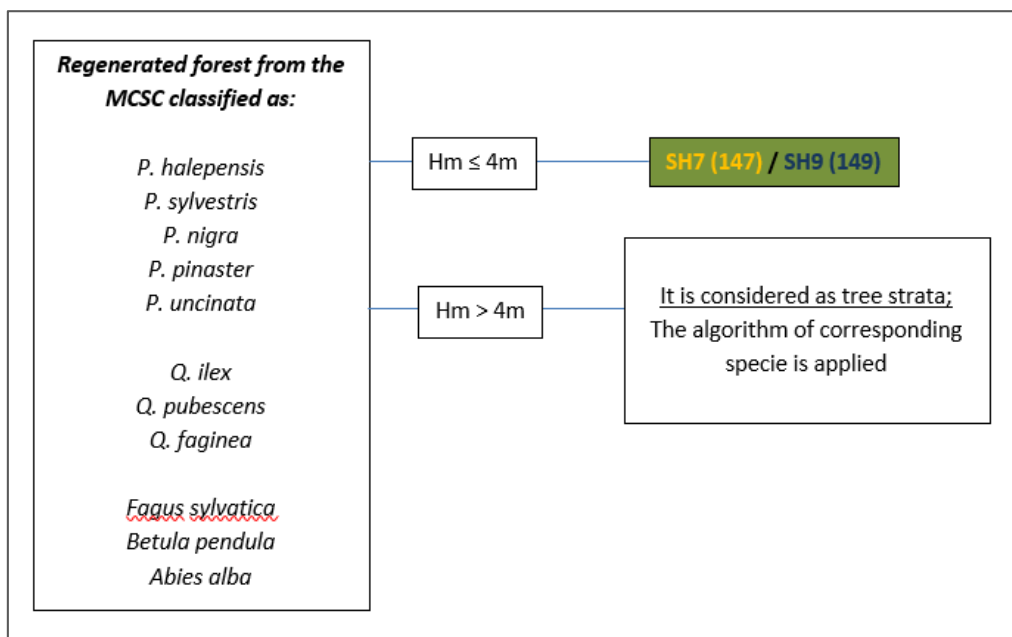

Algorithm used for assignment of the Scott and Burgan [62] model to the regenerated forest stands

### 3. Scrubland

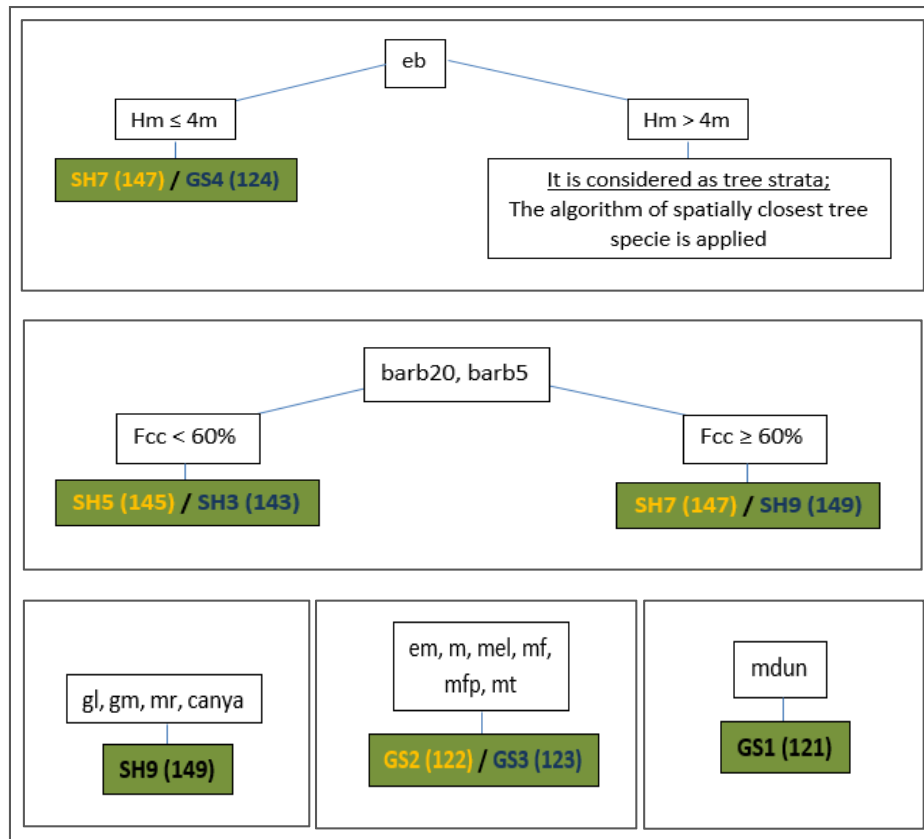

Algorithm used for assignation of the Scott and Burgan [62] model to stands predominantly populated by shrubs; model abbreviations correspond to the Land Cover Map of Catalonia nomenclature

### 4. Grassland

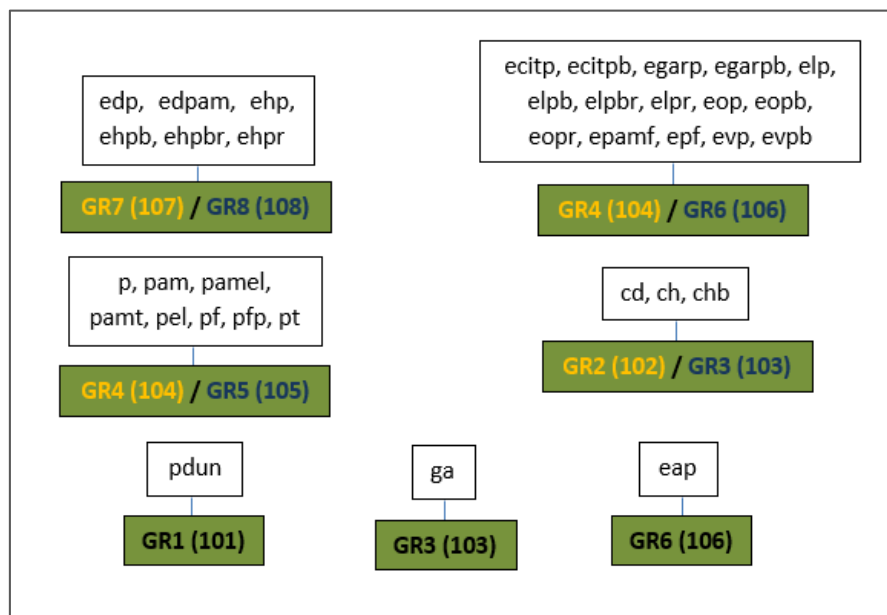

Algorithm used for assignation of the Scott and Burgan [62] model to areas predominately covered by herbs; model abbreviations correspond to the Land Cover Map of Catalonia nomenclature

## 5. Non-burnable

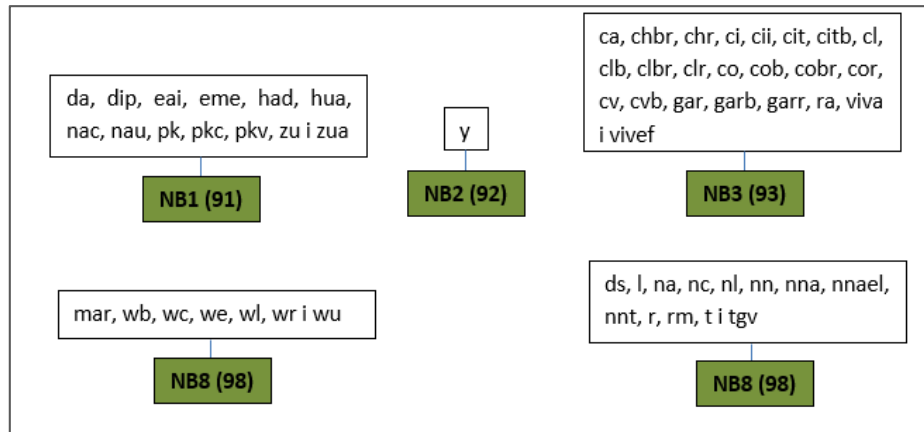

Algorithm used for assignation of the Scott and Burgan [62] model to non-burnable areas; model abbreviations correspond to the Land Cover Map of Catalonia nomenclature
